# Supplementary material
Source: PubMed Central journal article supplement (PMC5118925)

**Figure 1S.** Sample chromatograms at locus M-PAU14 from some observed MLGs of *Pu*,  $P \times m$  and  $P \times a$ .

1. MLG *Pu*-E1 amplified a single allele, which according to the diploid status of *Pu* would represent a homozygote locus.

2-3. MLGs  $P \times m$ -1 and  $P \times m$ -4 amplified 3 alleles. According to its ploidy level ( $4n$ ) and comparing the allele peak size, we assumed that alleles 77 or 75 were in 2 copies.

4-5. MLGs  $P \times a$ -1 and  $P \times a$ -3 amplified 3 alleles. Alleles 62 and 75/77 were assumed to represent the diploid  $P \times m$  subgenome in  $P \times a$ , as they were not present in *Pu*. Although allele 68 is shared by the three species, in these cases we assumed that this allele represented the haploid *Pu* subgenome.

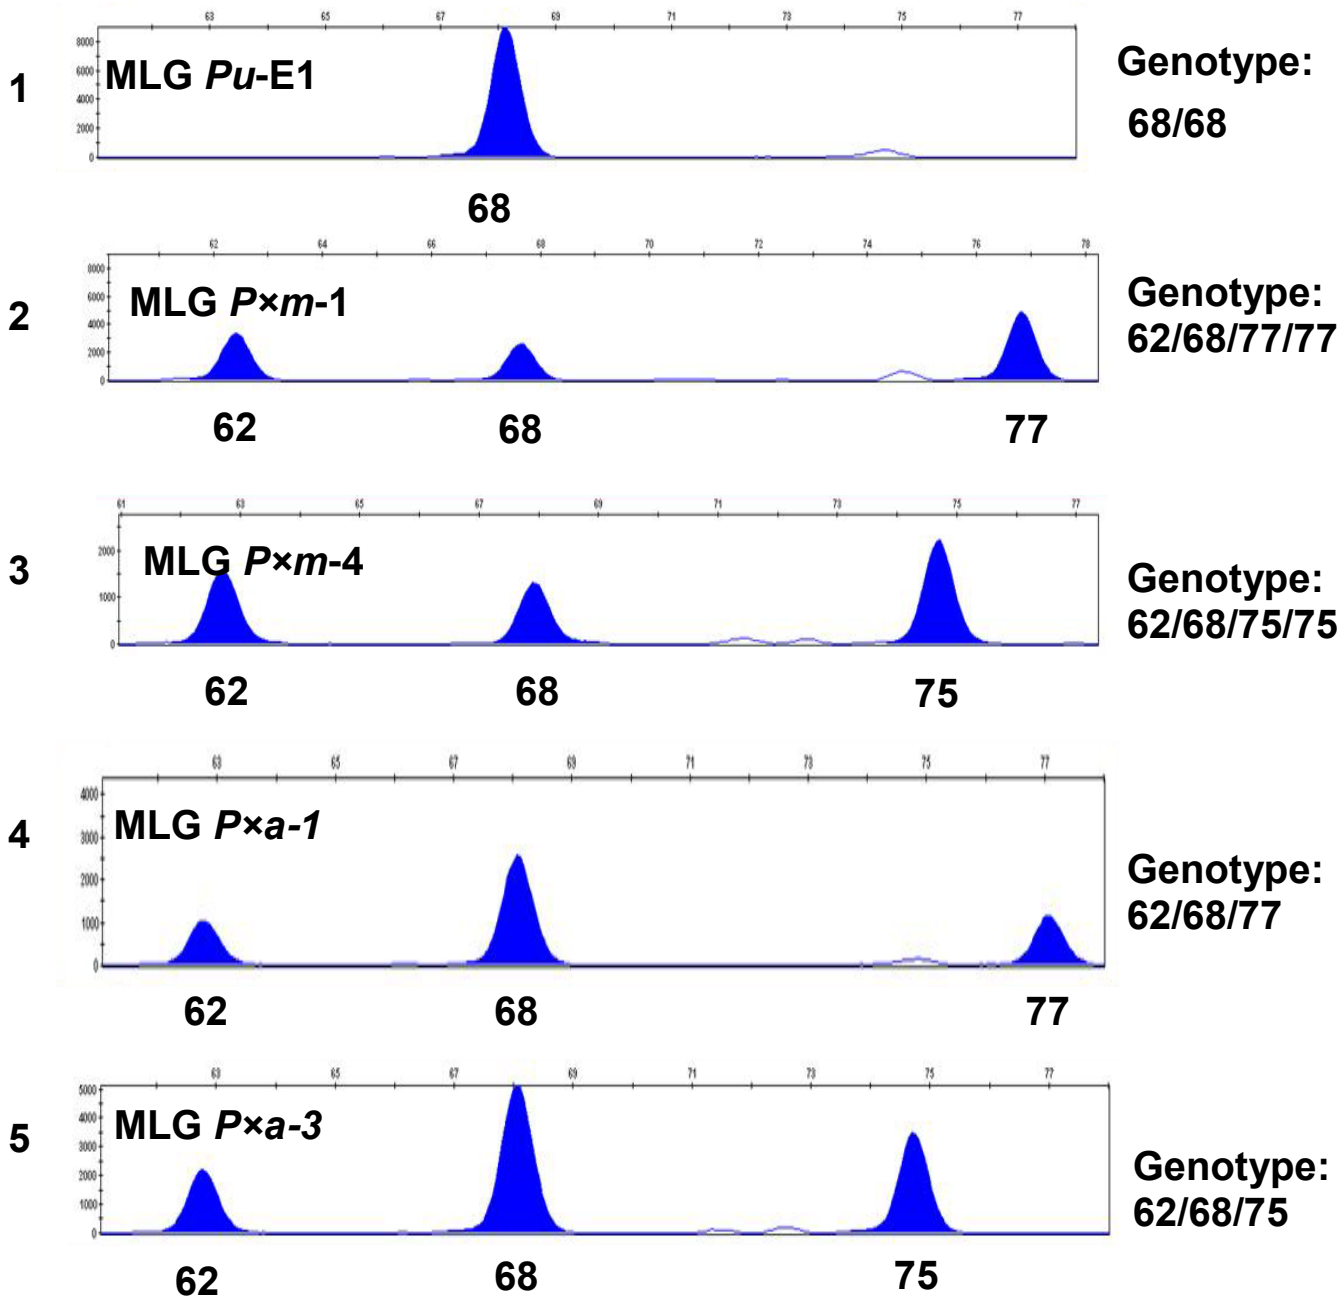

Supplement: AEM.02221-16_zam999117567so1.pdf [file AEM.02221-16_zam999117567so1.pdf]
